# Supplementary material
Source: publisher figshare collection journal article supplement (https://acs.figshare.com/ndownloader/files/4145857)

## **Supplementary Information**

### **SAR Matrices: Automated Extraction of Information-Rich SAR Tables from Large Compound Data Sets**

Anne Mai Wassermann, Peter Haebel, Nils Weskamp, and Jürgen Bajorath

### **Supplementary Figures S1-S2**



## Supplementary Figure Legends

**Supplementary Figure S1. Key-value pairing redundancies.** Key-value pairings (matrix cells) that correspond to identical molecules are highlighted using color-coded box frames.

**Supplementary Figure S2. Top-ranked matrices.** For all four scoring schemes, top-ranked matrices are displayed. For simplicity, compound structures are omitted. **(a)** Top-ranked triple-cut matrix for the GlaxoSmithKline (GSK) data set using the KS-based scoring scheme. **(b)** Top-ranked single-cut matrix for the GSK data set according to the discontinuity-oriented scoring scheme. **(c)** Top-ranked single-cut matrix for the carbonic anhydrase I (CAI) data set using the substituent-oriented scoring scheme. **(d)** Top-ranked triple-cut matrix for the CAI data set according to SAR transfer scoring.



# Supplementary Figure S1

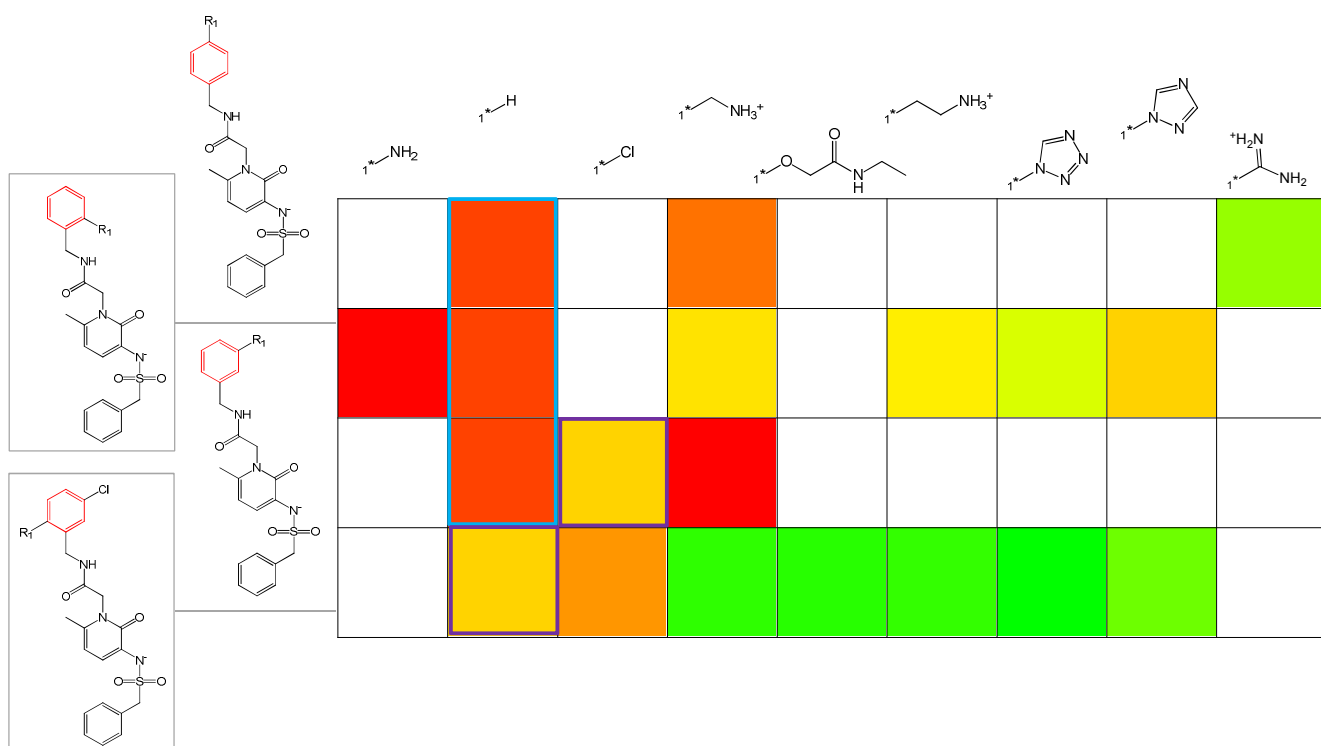



Supplementary Figure S2a

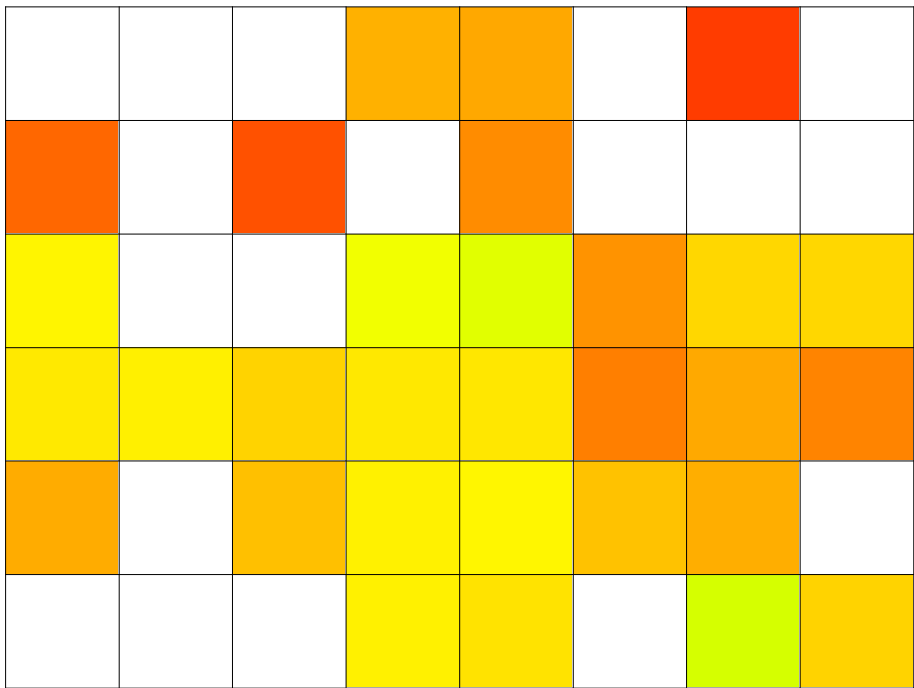



Supplementary Figure S2b

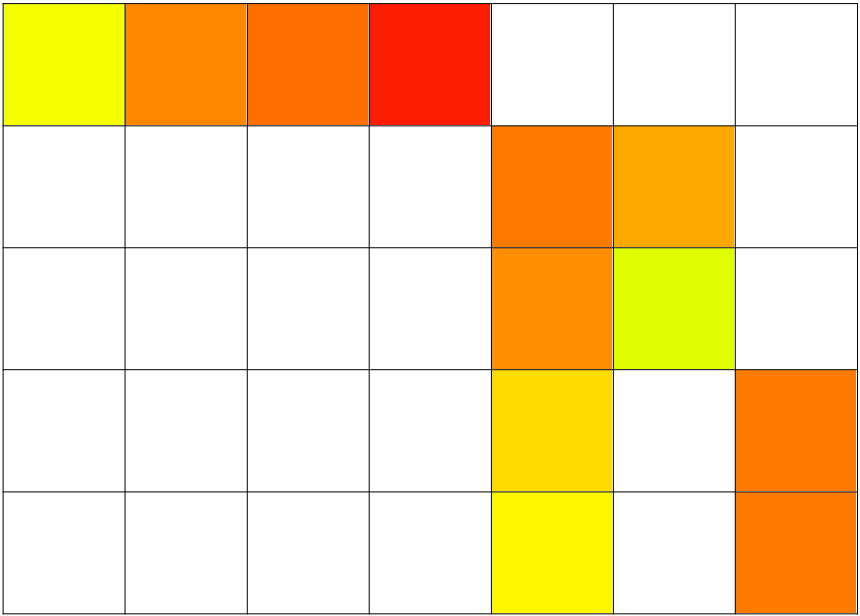



Supplementary Figure S2c

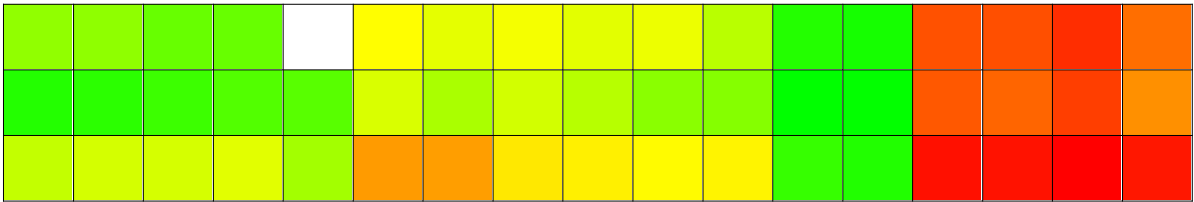



Supplementary Figure S2d

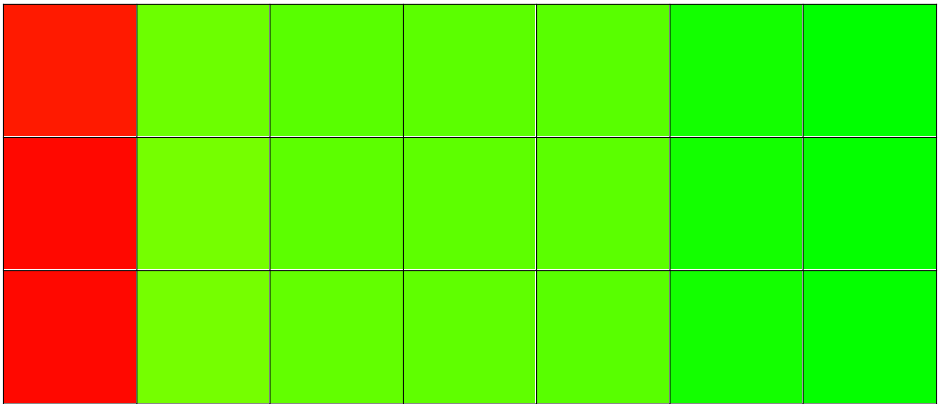

Supplement: Supplementary file 1 [file 4145857]
